# Supplementary material for: Synthesis and characterisation of layered double hydroxide dispersions in organic solvents
Source: Royal Society of Chemistry journal article supplement (doi:10.1039/c4ra08505a), 2014-01-01
Supplement: c4ra08505a1.pdf [file c4ra08505a1.pdf]

## **ELECTRONIC SUPPLEMENTARY INFORMATION**

### **Synthesis and Characterisation of Layered Double Hydroxide Dispersions in Organic Solvents**

Miaosen Yang, Olivia McDermott, Jean-Charles Buffet and Dermot O'Hare

Chemistry Research laboratory, 12 Mansfield Road, OX1 3TA Oxford, UK.  
E-mail: [dermot.ohare@chem.ox.ac.uk](mailto:dermot.ohare@chem.ox.ac.uk)

#### **Table of contents**

|                                                |    |
|------------------------------------------------|----|
| 1. General details                             | S2 |
| 2. Observations of organic solvent dispersions | S4 |
| 3. Characterisation                            | S6 |

## **1. General Details**

### **1.1 Fourier transform infrared (FTIR) spectroscopy**

FTIR spectra were recorded on a Biorad FTS-6000 FRIT Spectrometer equipped with a high performance DuraSamp1IR II diamond accessory of attenuated total reflection (ATR) mode in the range of 400 - 4000  $\text{cm}^{-1}$  with 40 scans at 4  $\text{cm}^{-1}$  resolution.

### **1.2 Powder X-ray diffraction (PXRD)**

PXRD patterns were recorded on a PANalytical X'Pert Pro instrument in reflection mode with Cu K $\alpha$  radiation ( $\lambda = 1.542 \text{ \AA}$ ). The accelerating voltage was set at 40 kV with 40 mA current at 0.01  $^\circ \text{ s}^{-1}$  from 3 to 70  $^\circ$  with a slit size of 1 $^\circ$ . Powder samples were loaded on stainless steel sample holders.

### **1.3 Surface area analysis**

Surface area analysis was carried out by Dr. Ashley Shepherd (University of Oxford). The gas adsorption isotherm for nitrogen adsorption onto the LDH surface was measured using a CE Instruments Sorptomatic 1990. The surface area was then calculated using the Brunauer–Emmett–Teller (BET) method. Before each measurement, LDH samples were first degassed overnight at 110  $^\circ\text{C}$ .

### **1.4 Thermogravimetric analysis (TGA)**

TGA was carried out using a Perkin Elmer TGA7 Thermogravimetric Analyser. Approximately 10 mg of sample was heated in a platinum pan in the furnace. Initially the temperature was held at 30  $^\circ\text{C}$  for 5 minutes and then was increased to 800  $^\circ\text{C}$  at a rate of 5  $^\circ\text{C}$  per minute. The sample was held at 800  $^\circ\text{C}$  for five minutes.

### **1.5 Transmission electron microscopy (TEM)**

TEM images were acquired at Harwell Science and Innovation Campus. A small amount of solid LDH was dispersed in ethanol using sonication and then cast onto copper grids coated with Formvar film. The samples were viewed using a JEOL 2100 microscope with an accelerating voltage of 200 kV.

### **1.6 Ultraviolet-visible (UV-Vis) spectroscopy**

Measurements were taken on a Cary Series UV-Vis Spectrometer. The dispersion was shaken and a small amount pipetted into a quartz cuvette. Three measurements were taken: of the sample immediately after it was pipetted into the cuvette, and of the upper and lower parts of the dispersion once it had settled. The wavelength range used was from 800 to 200 nm.

## 2. Observations for dispersions

Table S1.

| Washing Solvent | Dispersion Solvent | Time take to phase separate | Lower layer description                                          |
|-----------------|--------------------|-----------------------------|------------------------------------------------------------------|
| 2-propanol      | Ethyl benzene      | 24 hours                    | Translucent.                                                     |
| Acetone         | Ethyl benzene      | 1 hour                      | White solid.                                                     |
| Acetonitrile    | Ethyl benzene      | 1 hour                      | Pearlescent, thick.                                              |
| Dioxane         | Ethyl benzene      | 1 minute                    | Translucent, pearlescent.                                        |
| DMF             | Ethyl benzene      | 24 hours                    | Translucent, pearlescent.                                        |
| DMSO            | Ethyl benzene      | 20 seconds                  | White solid.                                                     |
| Ethanol         | Ethyl benzene      | 1 minute                    | White solid.                                                     |
| EA              | Ethyl benzene      | 1 hour                      | White solid.                                                     |
| EG              | Ethyl benzene      | 1 minute                    | White solid.                                                     |
| Methanol        | Ethyl benzene      | 6 hours                     | Pearlescent, but with some large gel-like aggregates.            |
| THF             | Ethyl benzene      | 24 hours                    | Pearlescent, but with some large gel-like aggregates.            |
| 1-propanol      | <i>o</i> -xylene   | 1 hour                      | Thick, pearlescent, translucent, almost opaque.                  |
| 2-propanol      | <i>o</i> -xylene   | 1 minute                    | Thick, pearlescent, translucent, almost opaque. Some aggregates. |
| Acetonitrile    | <i>o</i> -xylene   | 1 hour                      | Translucent.                                                     |
| Dioxane         | <i>o</i> -xylene   | 24 hours                    | Translucent.                                                     |
| DMF             | <i>o</i> -xylene   | 10 seconds                  | White solid.                                                     |
| DMSO            | <i>o</i> -xylene   | 1 minute                    | White solid.                                                     |
| Ethanol         | <i>o</i> -xylene   | 1 minute                    | White solid.                                                     |
| EA              | <i>o</i> -xylene   | 6 hours                     | Translucent, pearlescent.                                        |
| Methanol        | <i>o</i> -xylene   | 1 hour                      | Translucent.                                                     |
| THF             | <i>o</i> -xylene   | 1 hour                      | White solid.                                                     |
| 1-propanol      | <i>p</i> -xylene   | 1 hour                      | White solid.                                                     |
| 2-propanol      | <i>p</i> -xylene   | 1 hour                      | White solid.                                                     |

| Washing Solvent | Dispersion Solvent | Time take to phase separate | Lower layer description            |
|-----------------|--------------------|-----------------------------|------------------------------------|
| Acetone         | <i>p</i> -xylene   | 6 hours                     | Translucent, pearlescent.          |
| Dioxane         | <i>p</i> -xylene   | 1 hour                      | Translucent.                       |
| DMF             | <i>p</i> -xylene   | 24 hours                    | White solid.                       |
| DMSO            | <i>p</i> -xylene   | 1 hour                      | White solid.                       |
| Ethanol         | <i>p</i> -xylene   | 6 hours                     | Translucent.                       |
| EA              | <i>p</i> -xylene   | 1 minute                    | White solid.                       |
| EG              | <i>p</i> -xylene   | 10 seconds                  | White solid.                       |
| THF             | <i>p</i> -xylene   | 1 hour                      | White solid.                       |
| 1-propanol      | Toluene            | 1 hour                      | Translucent.                       |
| Acetone         | Toluene            | 24 hours                    | Translucent, pearlescent.          |
| Acetonitrile    | Toluene            | 24 hours                    | Translucent, almost transparent.   |
| Dioxane         | Toluene            | 6 hors                      | Translucent, with some aggregates. |
| DMF             | Toluene            | 1 hour                      | White solid.                       |
| DMSO            | Toluene            | 1 minute                    | White solid.                       |
| Ethanol         | Toluene            | 6 hours                     | Translucent.                       |
| EA              | Toluene            | 1 hour                      | White, gel like solid layer.       |
| EG              | Toluene            | 1 minute                    | White solid.                       |
| Methanol        | Toluene            | 1 hour                      | Translucent, pearlescent.          |
| THF             | Toluene            | 1 hour                      | White, gel like solid layer.       |

### 3. Characterisation

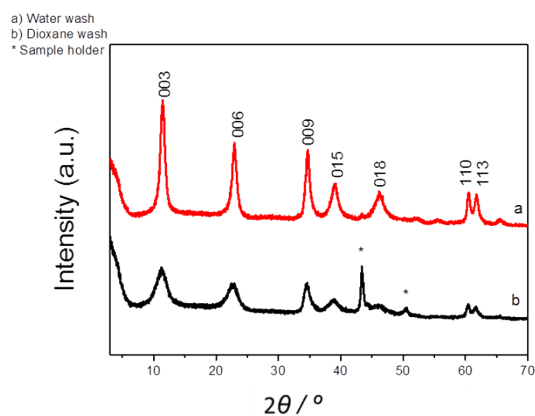

**Fig. S1** Powder X-ray diffraction patterns of dioxane-washed and water-washed MgAlCO<sub>3</sub>-LDH.

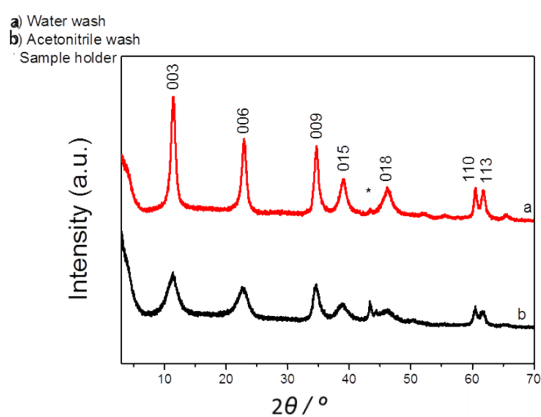

**Fig. S2** Powder X-ray diffraction patterns of acetonitrile-washed and water-washed MgAlCO<sub>3</sub>-LDH.

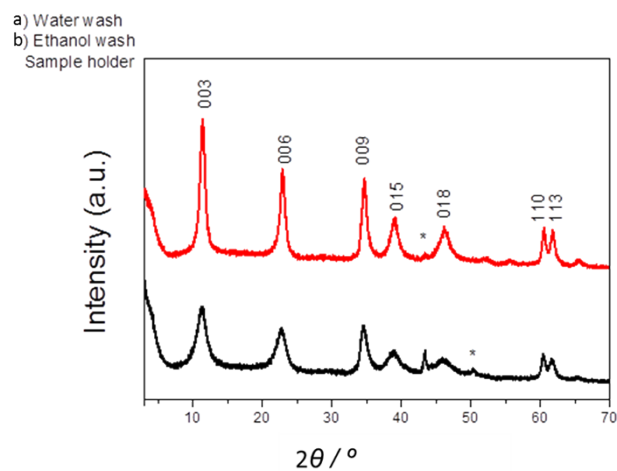

**Fig. S3** Powder X-ray diffraction patterns of ethanol-washed and water-washed MgAlCO<sub>3</sub>-LDH.

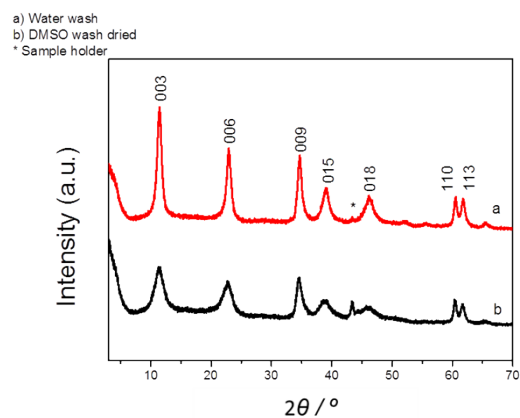

**Fig. S4** Powder X-ray diffraction patterns of DMSO-washed and water-washed  $\text{MgAlCO}_3\text{-LDH}$ .

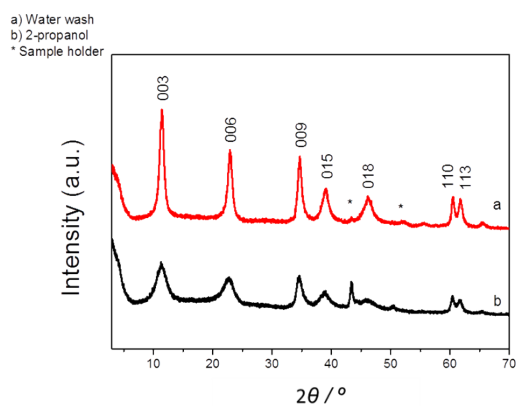

**Fig. S5** Powder X-ray diffraction patterns of 2-propanol-washed and water-washed  $\text{MgAlCO}_3\text{-LDH}$ .

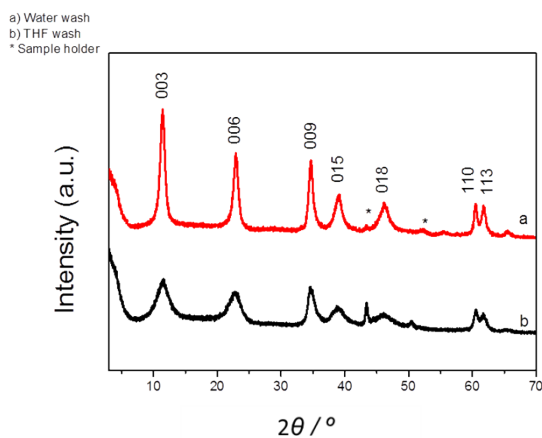

**Fig. S6** Powder X-ray diffraction patterns of THF-washed and water-washed  $\text{MgAlCO}_3\text{-LDH}$ .

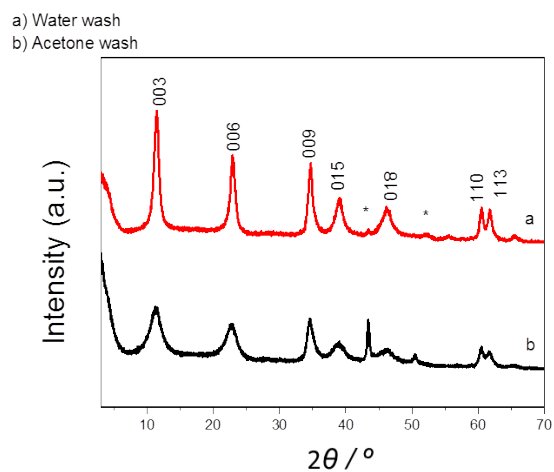

**Fig. S7** Powder X-ray diffraction patterns of acetone-washed and water-washed  $\text{MgAlCO}_3\text{-LDH}$ .

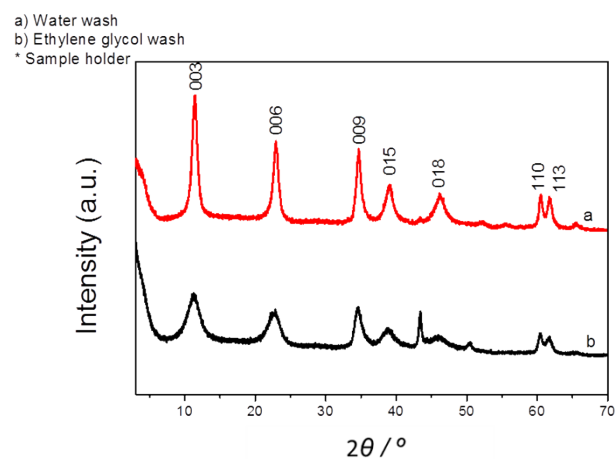

**Fig. S8** Powder X-ray diffraction patterns of ethylene glycol-washed and water-washed  $\text{MgAlCO}_3\text{-LDH}$ .

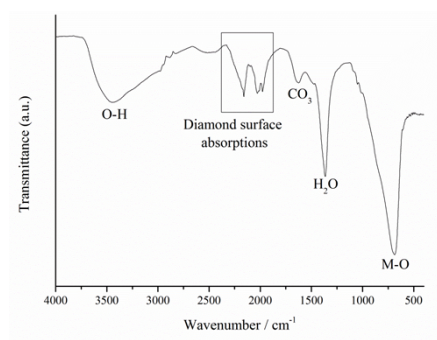

**Fig. S9** FTIR spectrum of ethanol-washed  $\text{MgAlCO}_3\text{-LDH}$ .



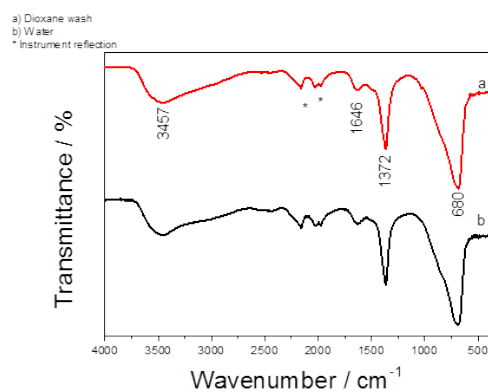

**Fig. S10** FTIR spectrum of dioxane-washed and water-washed  $\text{MgAlCO}_3\text{-LDH}$

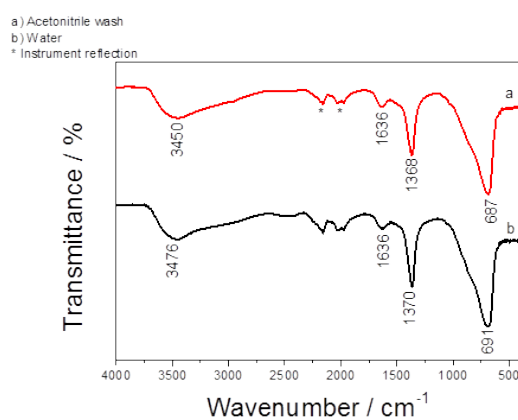

**Fig. S11** FTIR spectrum of acetonitrile-washed and water-washed  $\text{MgAlCO}_3\text{-LDH}$

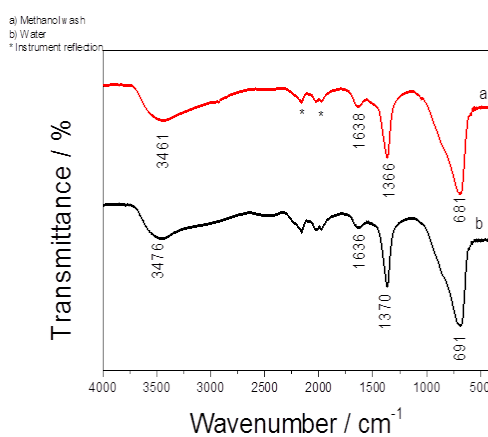

**Fig. S12** FTIR spectrum of methanol-washed and water-washed  $\text{MgAlCO}_3\text{-LDH}$

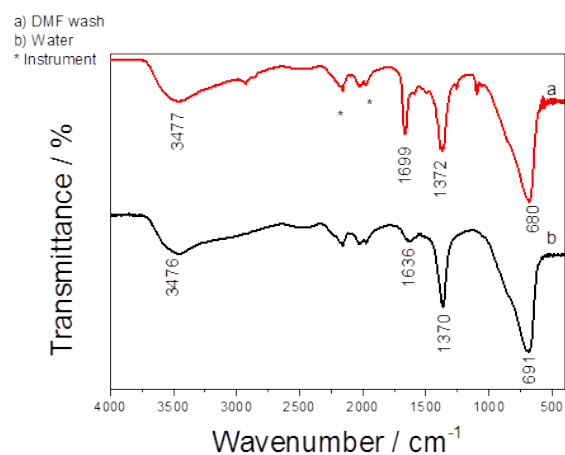

**Fig. S13** FTIR spectrum of DMF-washed and water-washed  $\text{MgAlCO}_3\text{-LDH}$

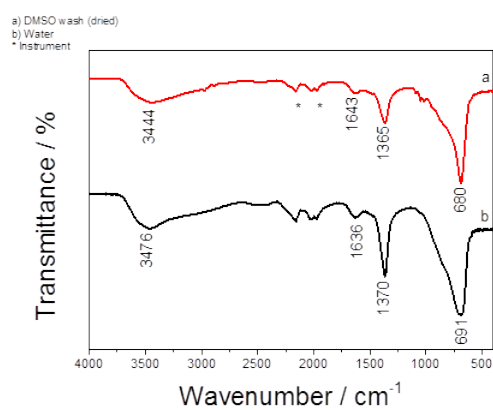

**Fig. S14** FTIR spectrum of DMSO-washed and water-washed  $\text{MgAlCO}_3\text{-LDH}$

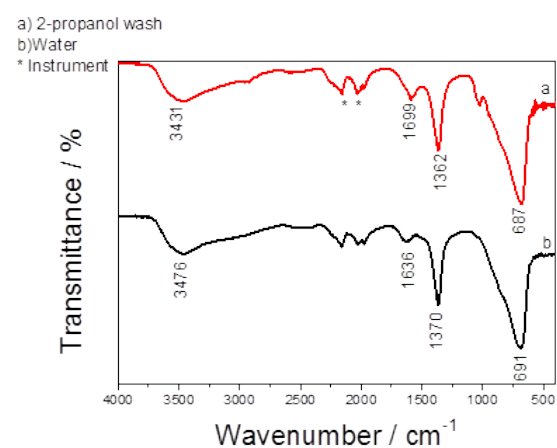

**Fig. S15** FTIR spectrum of 2-propanol-washed and water-washed  $\text{MgAlCO}_3\text{-LDH}$

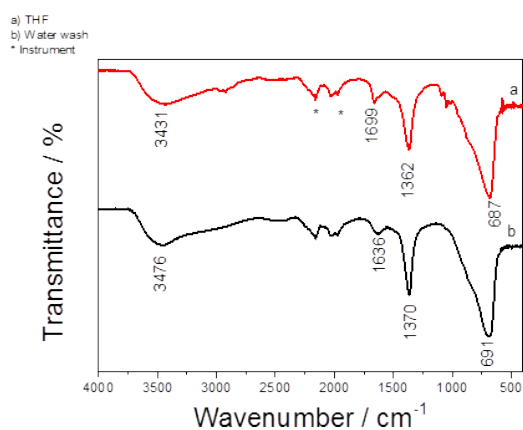

**Fig. S16** FTIR spectrum of THF-washed and water-washed  $\text{MgAlCO}_3\text{-LDH}$

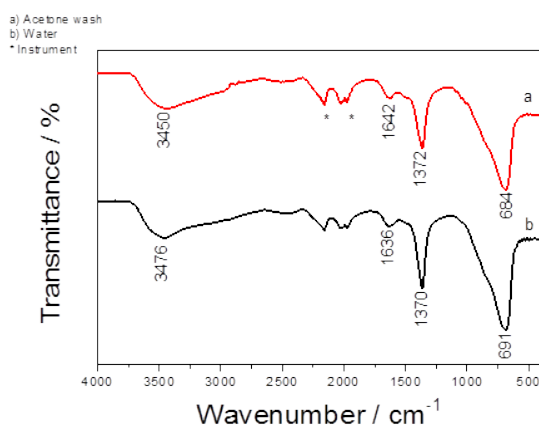

**Fig. S17** FTIR spectrum of acetone-washed and water-washed  $\text{MgAlCO}_3\text{-LDH}$

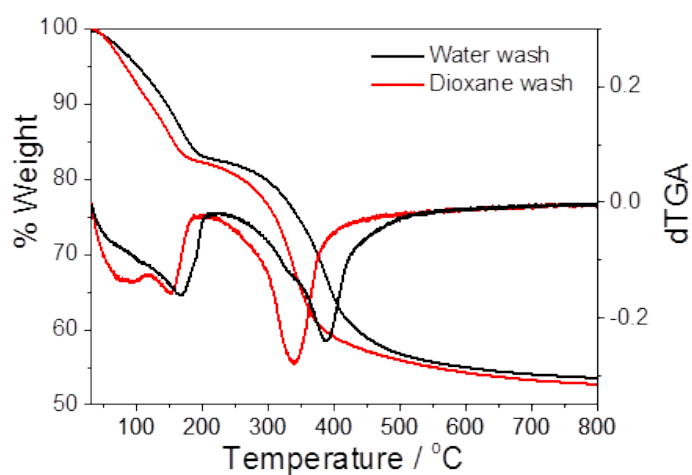

**Fig. S18** TGA and dTGA curves for dioxane-washed and water-washed  $\text{MgAlCO}_3\text{-LDH}$ .

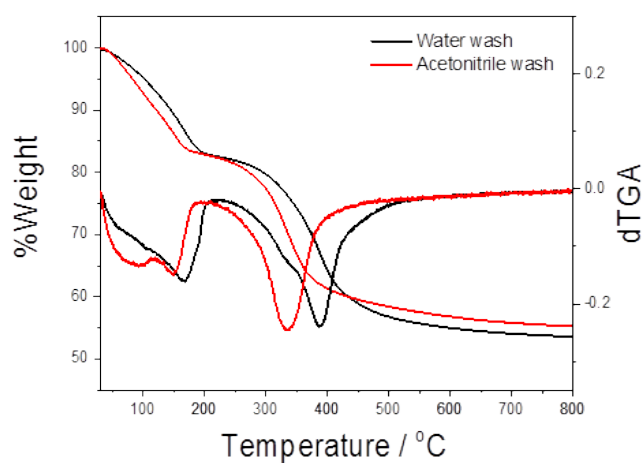

**Fig. S19** TGA and dTGA curves for acetonitrile-washed and water-washed MgAlCO<sub>3</sub>-LDH.

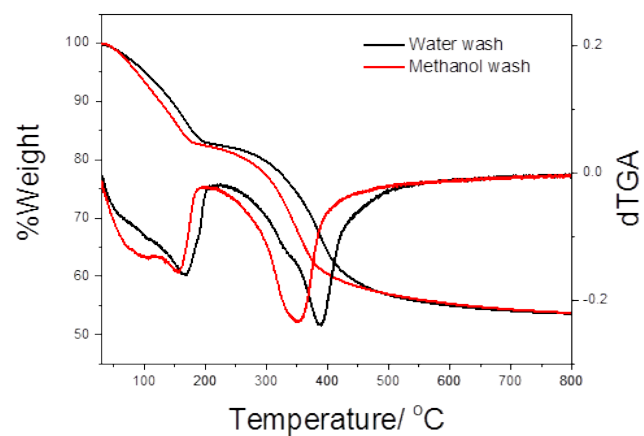

**Fig. S20** TGA and dTGA curves for methanol-washed and water-washed MgAlCO<sub>3</sub>-LDH.

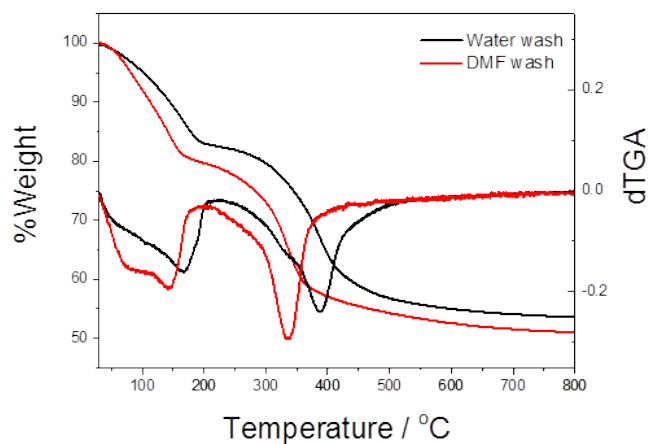

**Fig. S21** TGA and dTGA curves for DMF-washed and water-washed MgAlCO<sub>3</sub>-LDH.

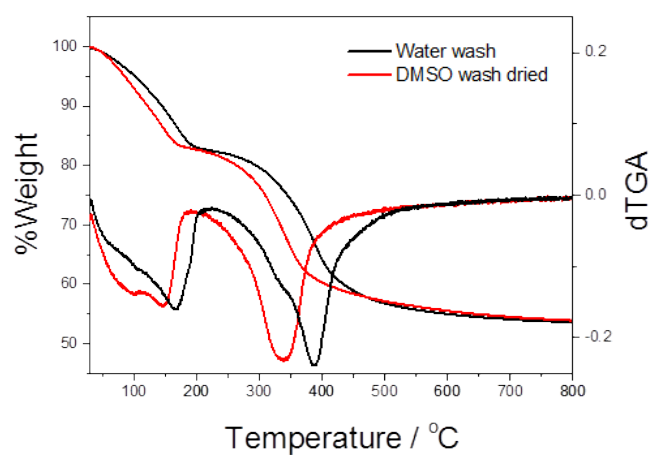

**Fig. S22** TGA and dTGA curves for DMSO-washed and water-washed MgAlCO<sub>3</sub>-LDH.

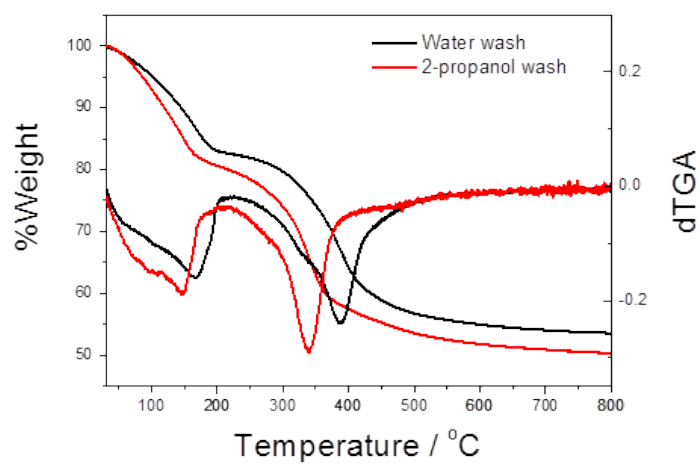

**Fig. S23** TGA and dTGA curves for 2-propanol-washed and water-washed MgAlCO<sub>3</sub>-LDH.

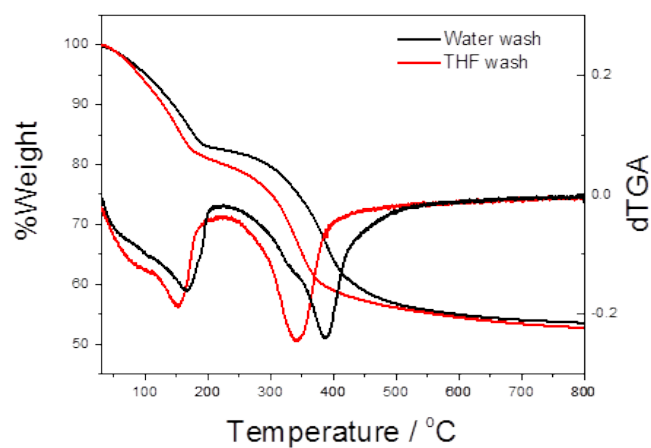

**Fig. S24** TGA and dTGA curves for THF-washed and water-washed MgAlCO<sub>3</sub>-LDH.

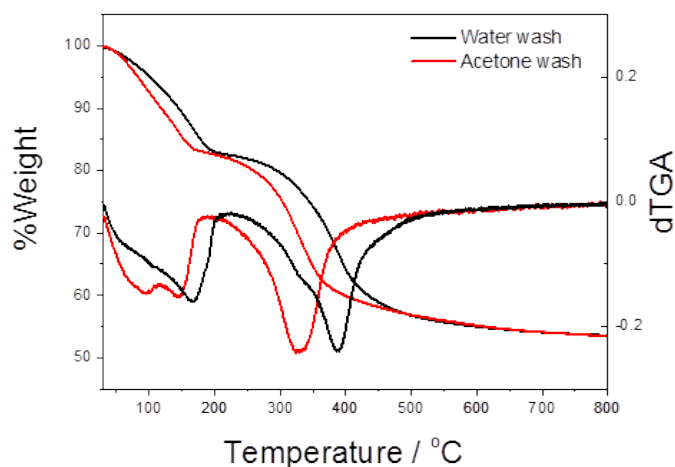

**Fig. S25** TGA and dTGA curves for acetone-washed and water-washed  $\text{MgAlCO}_3\text{-LDH}$ .

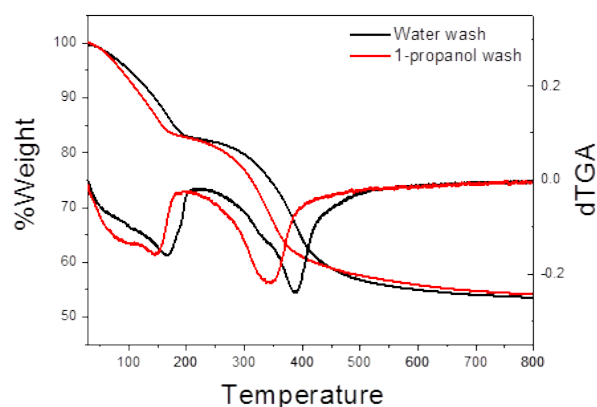

**Fig. S26** TGA and dTGA curves for 1-propanol-washed and water-washed  $\text{MgAlCO}_3\text{-LDH}$ .

**Table S2** Summary of the chemical formula of the AMO-LDHs using the thermal analysis data

| AMO Solvent  | Formula of LDH                                                                                                                      |
|--------------|-------------------------------------------------------------------------------------------------------------------------------------|
| Water        | $\text{Mg}_{0.75}\text{Al}_{0.25}(\text{OH})_2(\text{CO}_3)_{0.125} \cdot 0.78(\text{H}_2\text{O})$                                 |
| Dioxane      | $\text{Mg}_{0.75}\text{Al}_{0.25}(\text{OH})_2(\text{CO}_3)_{0.125} \cdot 0.28(\text{H}_2\text{O}) \cdot 0.07(\text{Dioxane})$      |
| Acetonitrile | $\text{Mg}_{0.75}\text{Al}_{0.25}(\text{OH})_2(\text{CO}_3)_{0.125} \cdot 0.27(\text{H}_2\text{O}) \cdot 0.15(\text{Acetonitrile})$ |
| Methanol     | $\text{Mg}_{0.75}\text{Al}_{0.25}(\text{OH})_2(\text{CO}_3)_{0.125} \cdot 0.29(\text{H}_2\text{O}) \cdot 0.20(\text{Methanol})$     |
| Ethanol      | $\text{Mg}_{0.75}\text{Al}_{0.25}(\text{OH})_2(\text{CO}_3)_{0.125} \cdot 0.30(\text{H}_2\text{O}) \cdot 0.13(\text{Ethanol})$      |
| DMF          | $\text{Mg}_{0.75}\text{Al}_{0.25}(\text{OH})_2(\text{CO}_3)_{0.125} \cdot 0.41(\text{H}_2\text{O}) \cdot 0.09(\text{DMF})$          |
| DMSO         | $\text{Mg}_{0.75}\text{Al}_{0.25}(\text{OH})_2(\text{CO}_3)_{0.125} \cdot 0.32(\text{H}_2\text{O}) \cdot 0.06(\text{DMSO})$         |
| 2-propanol   | $\text{Mg}_{0.75}\text{Al}_{0.25}(\text{OH})_2(\text{CO}_3)_{0.125} \cdot 0.40(\text{H}_2\text{O}) \cdot 0.07(2\text{-propanol})$   |
| THF          | $\text{Mg}_{0.75}\text{Al}_{0.25}(\text{OH})_2(\text{CO}_3)_{0.125} \cdot 0.43(\text{H}_2\text{O}) \cdot 0.06(\text{THF})$          |
| 1-propanol   | $\text{Mg}_{0.75}\text{Al}_{0.25}(\text{OH})_2(\text{CO}_3)_{0.125} \cdot 0.31(\text{H}_2\text{O}) \cdot 0.06(1\text{-propanol})$   |
| Acetone      | $\text{Mg}_{0.75}\text{Al}_{0.25}(\text{OH})_2(\text{CO}_3)_{0.125} \cdot 0.26(\text{H}_2\text{O}) \cdot 0.08(\text{Acetone})$      |

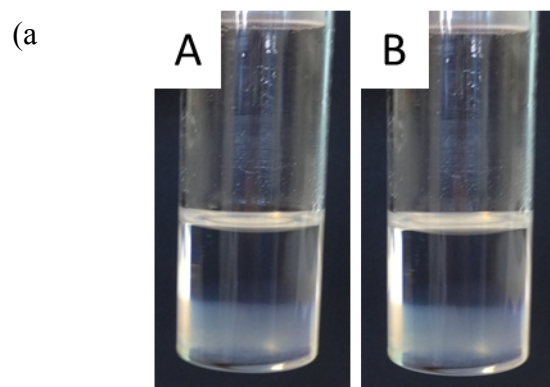

**Fig. S27** Photographs of Time Dependence Study after (a) 1 hour and (b) 24 hours.

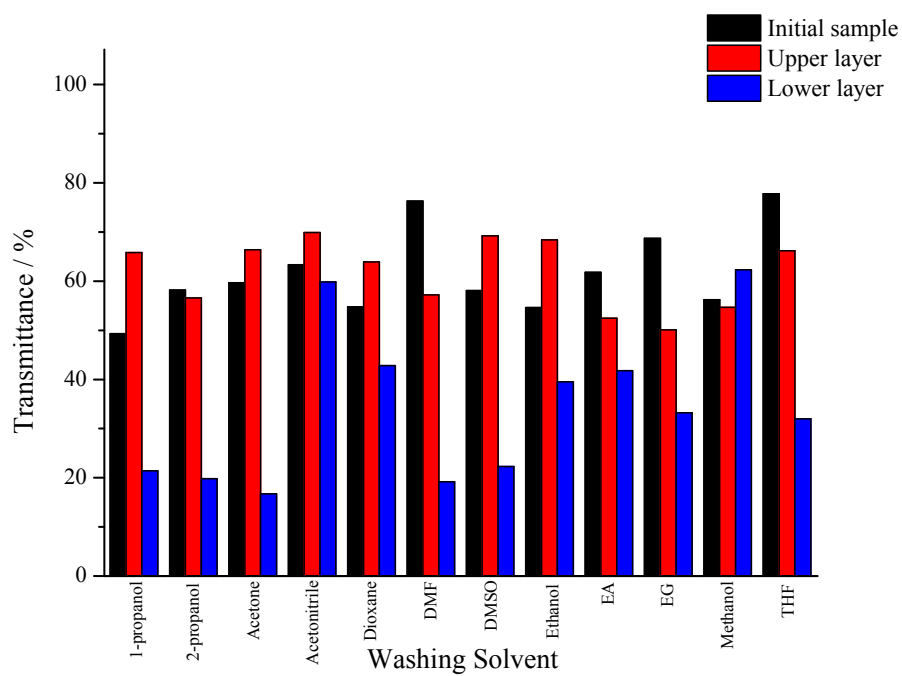

**Fig. S28** T% measured for MgAlCO<sub>3</sub>-LDH dispersed in *p*-xylene.

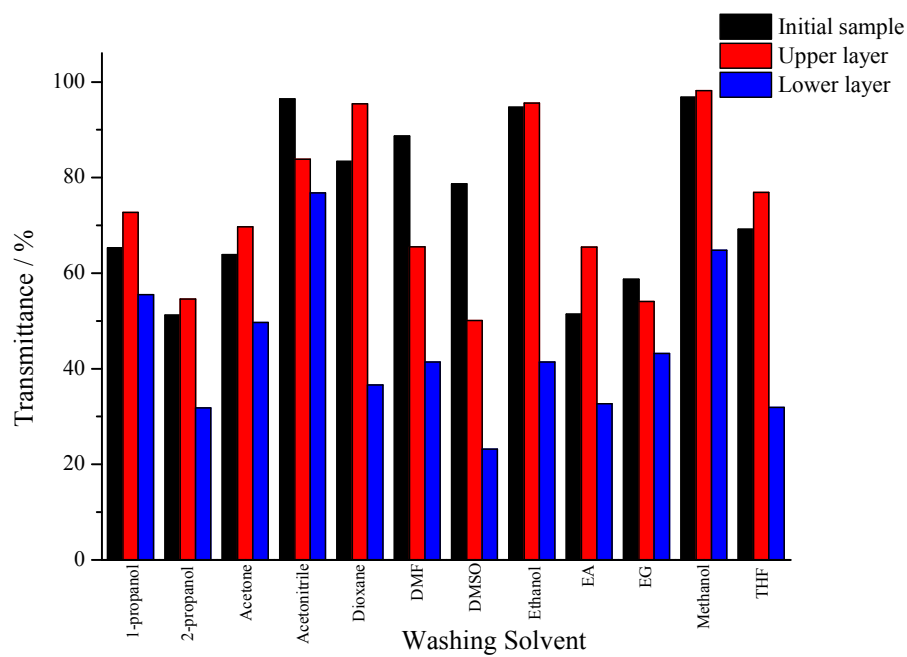

**Fig. S29** T% measured for MgAlCO<sub>3</sub>-LDH dispersed in toluene.

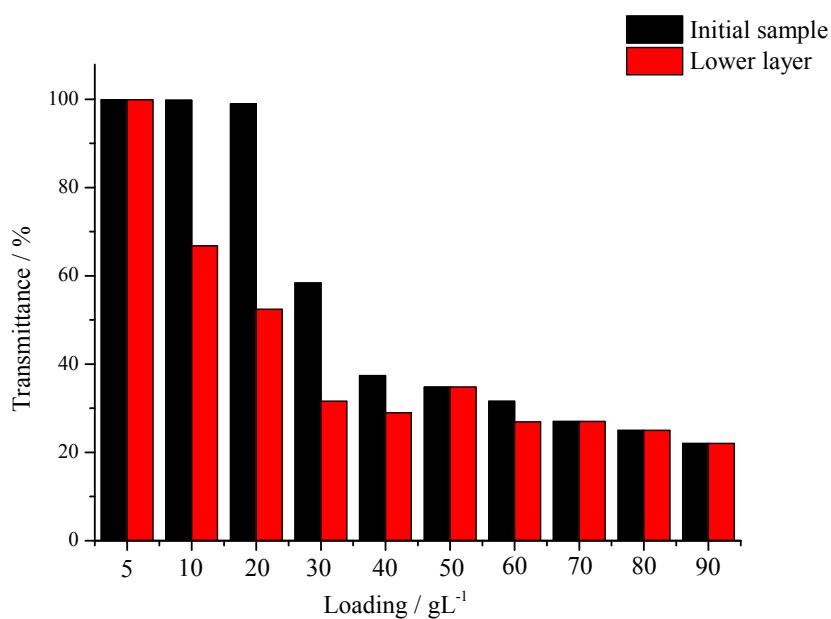

**Fig. S30** Bar chart showing effect of increasing loading for methanol-washed LDH dispersed in *o*-xylene



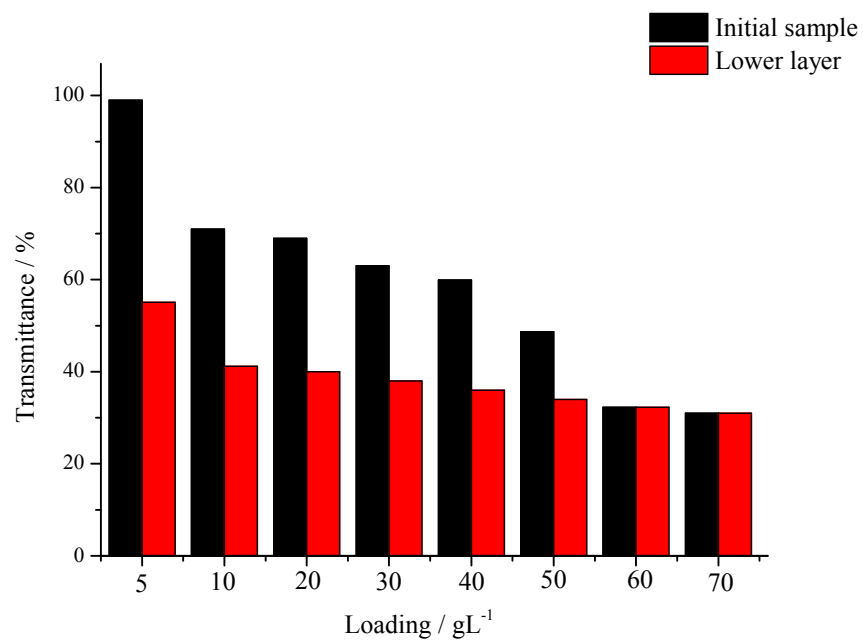

**Fig. S31** Bar chart showing effect of increasing loading for methanol-washed LDH dispersed in *p*-xylene
